# Supplementary material
Source: PubMed Central journal article supplement (PMC2667711)
Supplement: me.2008-0363_5.pdf [file me.2008-0363_5.pdf]



PB1  
b-act  
c PB1 siRNA

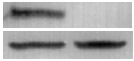

CBP  
b-act  
c CBP siRNA



SRC1  
b-act  
c SRC-1 siRNA

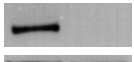

SRC2  
b-act  
c SRC-2 siRNA

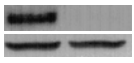

SRC3  
b-act  
c SRC-3 siRNA

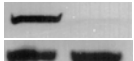

XRCC5  
b-act  
c XRCC5 siRNA
