# Supplementary material
Source: PubMed Central journal article supplement (PMC2667711)
Supplement: me.2008-0363_7.pdf [file me.2008-0363_7.pdf]

**ANDROGEN TARGET GENES**

| GENE<br>SYMBOL | FOLD INDUCTION |        |
|----------------|----------------|--------|
|                | 0.1 nM         | 1.0 nM |
| ACACA          | 1.400          | 1.452  |
| ACACB          | 2.336          | 0.813  |
| ACPP           | 0.649          | 1.100  |
| ACTA2          | 1.327          | 4.317  |
| ACTG2          | 2.180          | 5.963  |
| AMD1           | 1.100          | 1.179  |
| AR             | 0.526          | 0.407  |
| BCHE           | 0.763          | 0.306  |
| BCL2           | 1.207          | 0.769  |
| CASP2          | 1.060          | 0.837  |
| CDK8           | 0.612          | 0.414  |
| DHCR24         | 1.783          | 4.296  |
| FASN           | 0.880          | 3.797  |
| FDRS           | 1.221          | 1.209  |
| FN1            | 0.753          | 0.221  |
| HERC3          | 1.413          | 3.013  |
| HMGCR          | 1.097          | 2.052  |
| HMGCS1         | 1.120          | 1.308  |
| HMGCS2         | 1.516          | 1.862  |
| INSIG1         | 1.310          | 2.351  |
| INSIG2         | 0.721          | 0.604  |
| KLK2           | 6.552          | 9.633  |
| LIFR           | 1.156          | 3.006  |
| ME1            | 1.317          | 1.699  |
| MSMB           | 4.231          | 3.538  |
| MYL9           | 0.518          | 3.074  |
| MYLK           | 0.275          | 0.294  |
| NDRG1          | 1.358          | 5.378  |
| NFKBIA         | 0.869          | 1.167  |
| NKX3.1         | 2.133          | 2.749  |
| ODC1           | 1.051          | 2.181  |
| PIK3R3         | 0.917          | 0.467  |
| RAB4A          | 1.072          | 1.333  |
| SAT            | 1.056          | 1.251  |
| SCAP           | 1.094          | 1.294  |
| SMS            | 1.166          | 1.198  |
| SREBF1         | 0.684          | 1.202  |
| SREBF2         | 1.072          | 1.553  |
| TMPRSS2        | 1.924          | 3.408  |
| TPM1           | 0.775          | 1.328  |
| VEGFA          | 1.025          | 3.006  |
| VEGFC          | 2.357          | 0.904  |

**COREGULATOR GENES**

| GENE<br>SYMBOL | FOLD INDUCTION |        |
|----------------|----------------|--------|
|                | 0.1 nM         | 1.0 nM |
| ACTL6A         | 1.201          | 1.006  |
| AES*           | 0.955          | 0.965  |
| ANP32A*        | 0.996          | 0.987  |
| ANT-1*         | 0.726          | 0.943  |
| AOF2*          | 0.958          | 0.851  |
| APPBP2*        | 1.078          | 1.896  |
| APPL*          | 0.806          | 0.816  |
| ARID1A*        | 0.708          | 0.875  |
| BAG1*          | 0.891          | 0.935  |
| BAZ1B          | 0.974          | 0.843  |
| BCL3           | 0.539          | 1.148  |
| BCL11A         | 1.106          | 0.930  |
| BCL11B         | 0.598          | 1.091  |
| BLOC1S1        | 0.859          | 0.988  |
| BRCA1*         | 1.576          | 0.904  |
| BRCA2*         | 1.603          | 1.132  |
| BRD8           | 1.166          | 0.888  |
| C1D            | 1.073          | 1.053  |
| CARM1*         | 1.238          | 0.997  |
| CAV1*          | 1.461          | 0.909  |
| CCND1*         | 0.877          | 0.930  |
| CCNE1*         | 1.421          | 0.782  |
| CDK37*         | 0.990          | 1.202  |
| CDK7           | 0.964          | 1.023  |
| CITED1         | 1.153          | 1.515  |
| CMTM2*         | 2.020          | 0.937  |
| COCOA*         | 0.799          | 0.569  |
| COPS2*         | 1.060          | 0.875  |
| COPS5          | 0.887          | 0.905  |
| CRABP2         | 0.660          | 0.391  |
| CREBBP*        | 0.978          | 0.663  |
| CRSP2*         | 0.783          | 0.887  |
| CTBP1          | 0.900          | 0.523  |
| CTNNB1*        | 0.796          | 0.851  |
| DDC*           | 1.565          | 0.675  |
| DDX5           | 0.844          | 0.918  |
| DDX17          | 0.703          | 0.858  |
| DDX20          | 1.395          | 0.908  |
| DDX54          | 1.042          | 1.234  |
| DHX9           | 1.081          | 0.828  |
| DJBP*          | 0.963          | 0.647  |
| DNAJA1*        | 1.022          | 0.968  |
| EDD1           | 0.904          | 0.683  |
| EDF1           | 0.938          | 0.964  |
| EP300*         | 0.788          | 0.889  |
| FHL2*          | 2.278          | 3.119  |
| FKBP5*         | 2.924          | 6.008  |
| FLNA*          | 0.575          | 1.110  |
| FUS            | 0.955          | 0.551  |
| GAK*           | 0.532          | 0.945  |
| GCN5L2         | 1.044          | 0.915  |
| GMEB1          | 1.281          | 0.932  |
| GMEB2          | 2.184          | 0.709  |
| GNB2L1*        | 1.014          | 0.947  |
| GSN*           | 1.392          | 0.977  |
| HDAC1*         | 0.748          | 0.759  |
| HDAC3          | 0.998          | 1.071  |
| HEY1*          | 1.330          | 0.864  |
| HIPK3          | 0.879          | 0.815  |
| HNRPU          | 1.026          | 0.966  |
| HR             | 0.522          | 1.432  |
| HRMT1L1        | 0.893          | 1.054  |

| GENE<br>SYMBOL | FOLD INDUCTION |        |
|----------------|----------------|--------|
|                | 0.1 nM         | 1.0 nM |
| HRMT1L2*       | 1.065          | 0.996  |
| HTATIP*        | 0.749          | 0.828  |
| HTATIP2        | 1.042          | 1.154  |
| IQWD1*         | 1.017          | 1.269  |
| ITGB3BP        | 1.209          | 1.015  |
| JDP2           | 0.946          | 0.498  |
| MAGEA11*       | 1.344          | 1.552  |
| MGMT           | 0.539          | 0.715  |
| MLL2           | 0.829          | 0.846  |
| MLL3           | 0.586          | 0.437  |
| MLR2           | 0.889          | 0.961  |
| MMS19L         | 0.754          | 1.026  |
| MTA1           | 0.754          | 0.684  |
| MYST2*         | 1.078          | 0.772  |
| NCOA1*         | 0.796          | 0.760  |
| NCOA2*         | 0.816          | 0.657  |
| NCOA3*         | 0.789          | 0.505  |
| NCOA4*         | 1.039          | 1.032  |
| NCOA5          | 0.538          | 0.721  |
| NCOA6*         | 0.835          | 0.888  |
| NCOA6IP        | 1.075          | 1.005  |
| NCOA7          | 0.616          | 0.397  |
| NCOR1*         | 0.949          | 0.986  |
| NCOR2*         | 0.496          | 0.846  |
| NEDD4          | 1.287          | 0.870  |
| NONO*          | 0.923          | 0.872  |
| NRIP1*         | 0.826          | 0.660  |
| NRIP2          | 2.362          | 0.857  |
| NSD1*          | 0.824          | 0.694  |
| PA2G4*         | 1.224          | 1.048  |
| PAK6*          | 0.695          | 1.042  |
| PARK7*         | 1.114          | 1.032  |
| PB1            | 0.886          | 0.833  |
| PCAF*          | 1.115          | 0.901  |
| PELP1*         | 1.565          | 0.943  |
| PHB2           | 0.985          | 0.928  |
| PIAS1*         | 0.872          | 1.218  |
| PIAS2*iso1     | 0.756          | 0.685  |
| PIAS2*iso2     | 0.950          | 0.888  |
| PIAS3*         | 0.829          | 0.992  |
| PIAS4*         | 0.622          | 0.927  |
| PLAGL1*        | 2.043          | 0.970  |
| PNRC1*         | 0.802          | 0.888  |
| PNRC2          | 0.748          | 0.760  |
| PPARBP*        | 0.889          | 0.943  |
| PPARGC1A       | 1.748          | 0.776  |
| PPARGC1B       | 2.020          | 0.981  |
| PRIC285*       | 0.614          | 0.887  |
| PRKDC*         | 1.188          | 0.816  |
| PSMC3          | 1.221          | 1.006  |
| PSMC4          | 0.877          | 1.009  |
| PSMC5          | 0.967          | 0.961  |
| PXN*           | 0.813          | 1.094  |
| RAD54L2        | 1.929          | 0.863  |
| RAD9A*         | 0.938          | 0.808  |
| RAN*           | 1.162          | 0.945  |
| RANBP9*        | 0.790          | 0.929  |
| RAP80          | 1.288          | 1.094  |
| RB1*           | 0.715          | 0.893  |
| RBAK*          | 0.801          | 0.770  |
| RBM9           | 0.791          | 0.661  |
| RBM14          | 1.059          | 0.908  |

| GENE<br>SYMBOL | FOLD INDUCTION |        |
|----------------|----------------|--------|
|                | 0.1 nM         | 1.0 nM |
| RCHY1*         | 0.891          | 0.929  |
| RING1          | 0.680          | 0.646  |
| RNF4*          | 1.091          | 1.203  |
| RNF14*         | 1.032          | 1.303  |
| RNPC2          | 1.005          | 0.934  |
| SAFB           | 1.008          | 0.792  |
| SAFB2          | 1.150          | 0.945  |
| SCAND1         | 0.543          | 0.916  |
| SFPQ*          | 0.812          | 0.904  |
| SIN3B          | 0.862          | 1.006  |
| SIRT1*         | 0.945          | 0.860  |
| SIX3           | 0.343          | 0.234  |
| SMAD3*         | 0.765          | 0.461  |
| SMARCA2*       | 0.765          | 0.740  |
| SMARCA4*       | 0.795          | 0.748  |
| SMARCB1        | 0.800          | 0.890  |
| SMARCC1*       | 1.074          | 1.109  |
| SMARCC2iso1    | 0.797          | 0.726  |
| SMARCC2iso2    | 0.716          | 0.576  |
| SMARCD1        | 0.916          | 0.804  |
| SMARCD2        | 0.880          | 1.061  |
| SMARCD3iso1    | 0.388          | 0.302  |
| SMARCD3iso2    | 1.265          | 0.877  |
| SMARCE1*       | 0.947          | 0.868  |
| SMW1           | 0.937          | 0.918  |
| SPEN           | 1.032          | 0.849  |
| SQSTM1         | 0.586          | 1.005  |
| SRA1*          | 1.826          | 0.705  |
| SRCAP*         | 1.165          | 0.644  |
| STUB1*         | 0.577          | 1.049  |
| SVIL* iso1     | 0.781          | 0.600  |
| SVIL* iso2     | 1.297          | 0.525  |
| TADA2L         | 1.536          | 0.863  |
| TADA3L         | 0.908          | 1.059  |
| TBL1X          | 0.965          | 1.095  |
| TBL1XR1        | 0.933          | 0.974  |
| TBPIP*         | 2.511          | 0.979  |
| TGFB11i        | 1.301          | 1.117  |
| TGIF*          | 1.040          | 1.061  |
| THRAP4*        | 1.052          | 0.903  |
| TLE1           | 1.032          | 0.956  |
| TMF1*          | 0.953          | 1.064  |
| TRA16          | 1.427          | 1.227  |
| TRIM24*        | 0.997          | 1.087  |
| TRIP4          | 1.410          | 0.889  |
| TRIP6          | 0.640          | 1.202  |
| TRIP11         | 1.114          | 0.775  |
| TRRAP          | 0.930          | 0.880  |
| TSC2           | 0.665          | 0.981  |
| TSG101*        | 0.824          | 0.916  |
| UBE1C*         | 0.900          | 0.809  |
| UBE2I*         | 0.943          | 0.979  |
| UBE3A*         | 0.967          | 0.883  |
| UXT*           | 0.982          | 1.011  |
| WDR77*         | 0.970          | 1.081  |
| XRCC5*         | 1.077          | 1.168  |
| XRCC6*         | 0.899          | 1.073  |
| ZIMP7*         | 0.446          | 1.039  |
| ZNF278*        | 1.195          | 0.655  |
| ZNF335         | 1.022          | 1.020  |
| ZNF653         | 0.705          | 1.025  |
| ZNHIT3         | 0.866          | 0.955  |

**CONTROL GENES**

| GENE<br>SYMBOL | FOLD INDUCTION |        |
|----------------|----------------|--------|
|                | 0.1 nM         | 1.0 nM |
| GAPDH          | 1.064          | 0.955  |
| PGK1           | 1.080          | 1.120  |
| YWHAZ          | 1.021          | 1.081  |
