# Supplementary material
Source: PubMed Central journal article supplement (PMC2667711)
Supplement: me.2008-0363_8.pdf [file me.2008-0363_8.pdf]

| target gene | primer pair | primer sequence       |
|-------------|-------------|-----------------------|
| SRC-1       | 5'          | ctctggattcagggcttctg  |
|             | 3'          | gttcggcagttgtgtcaaa   |
| SRC-2       | 5'          | ggcaagaagagttcccatga  |
|             | 3'          | ctgctctcatgggtgctgta  |
| SRC-3       | 5'          | cacatgggagtcctggtctt  |
|             | 3'          | ggttcccagattgccagaa   |
| CBP         | 5'          | cccctgggaaataatccaat  |
|             | 3'          | cgttcacagtggtgttg     |
| PB1         | 5'          | ttgtgagagccgctacaatg  |
|             | 3'          | aaggatgatggctccttctga |
| BAG1        | 5'          | gcagcagtgaccagttgtc   |
|             | 3'          | caacgggtgttccatttct   |
| MAGEA11     | 5'          | caactgctcttggcattga   |
|             | 3'          | ggcatgctctgctcattaca  |
| NCOA7       | 5'          | gacttcggattccagaccaa  |
|             | 3'          | ccatgggatgtctccctaga  |
| RIP140      | 5'          | gtgcatttcccactgtcaa   |
|             | 3'          | agacagcctcttccgcttg   |
| NSD1        | 5'          | gcaaggataagatgggcaaa  |
|             | 3'          | ggtggtggcttctgtcatt   |
| PIAS1       | 5'          | ctgcagccttccaggttac   |
|             | 3'          | gtggacagtcggacaagtga  |
| IQWD1       | 5'          | tgatcccaggtgcaaggat   |
|             | 3'          | agcggccttctaattgtcaa  |
| TMF1        | 5'          | ggagagccgggaataagttc  |
|             | 3'          | ctccgaactggcttgtgat   |
| RNF14       | 5'          | ctgtccaagggtggagaaacc |
|             | 3'          | aagtggaggcagaaagcaaa  |
| XRCC5       | 5'          | gaaggatgaagatgggttga  |
|             | 3'          | aattggagccaatggtcagt  |
| PSA         | 5'          | aggccttccctgtacaccaa  |
|             | 3'          | gtcttggcctggtcatttc   |
| KLK2        | 5'          | ctgtcagagcctgccaagat  |
|             | 3'          | gcaagaactcctctggttcg  |
| TMPRSS2     | 5'          | ctgccaagggtgcttctcatt |
|             | 3'          | ctgtcacctggcaagaatc   |
| SCAP        | 5'          | cggtagacctggaggtga    |
|             | 3'          | cgggcactagggtgaagtag  |
| Maspin      | 5'          | ccctatgcaaaggaattgga  |
|             | 3'          | caaagtggccatctgtgaga  |
| FN1         | 5'          | ccctaaaggactggcattca  |
|             | 3'          | catcctcagggtcagtag    |

Table S2. Primers used to perform real-time RT-PCR
