# Supplementary material
Source: PubMed Central journal article supplement (PMC2667711)

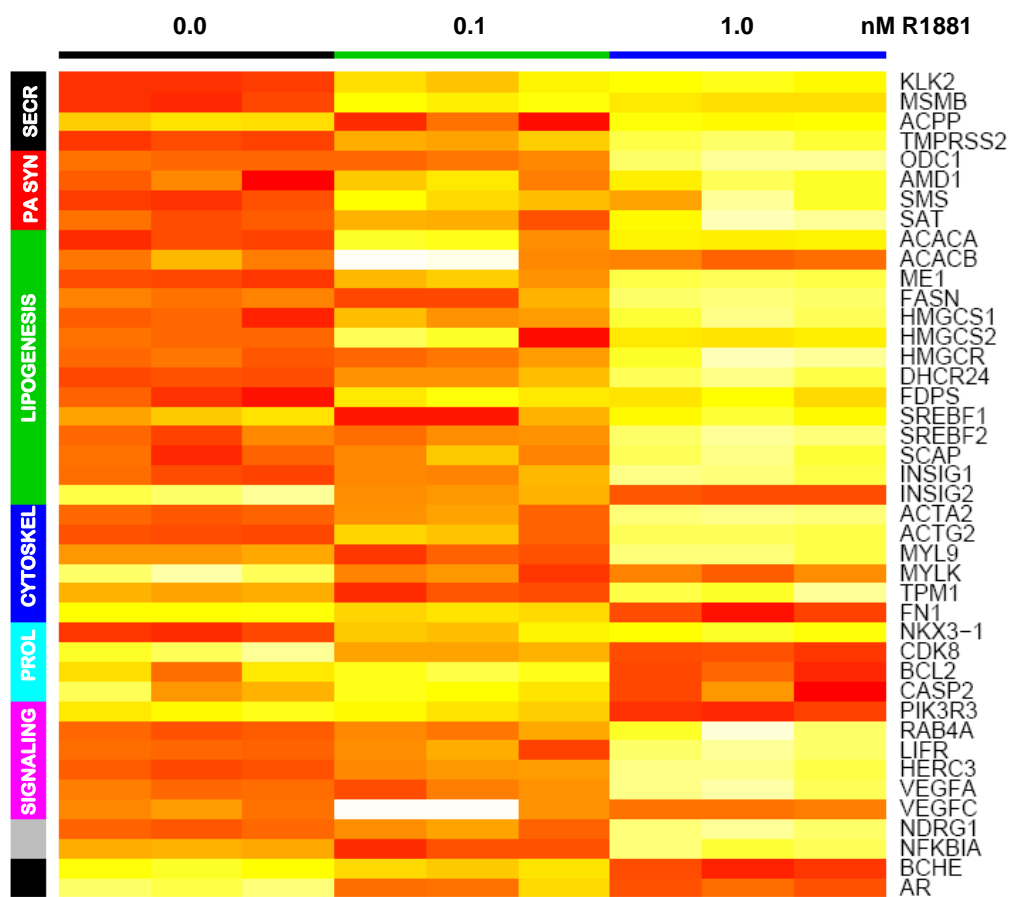

Supplement: me.2008-0363_1.pdf [file me.2008-0363_1.pdf]

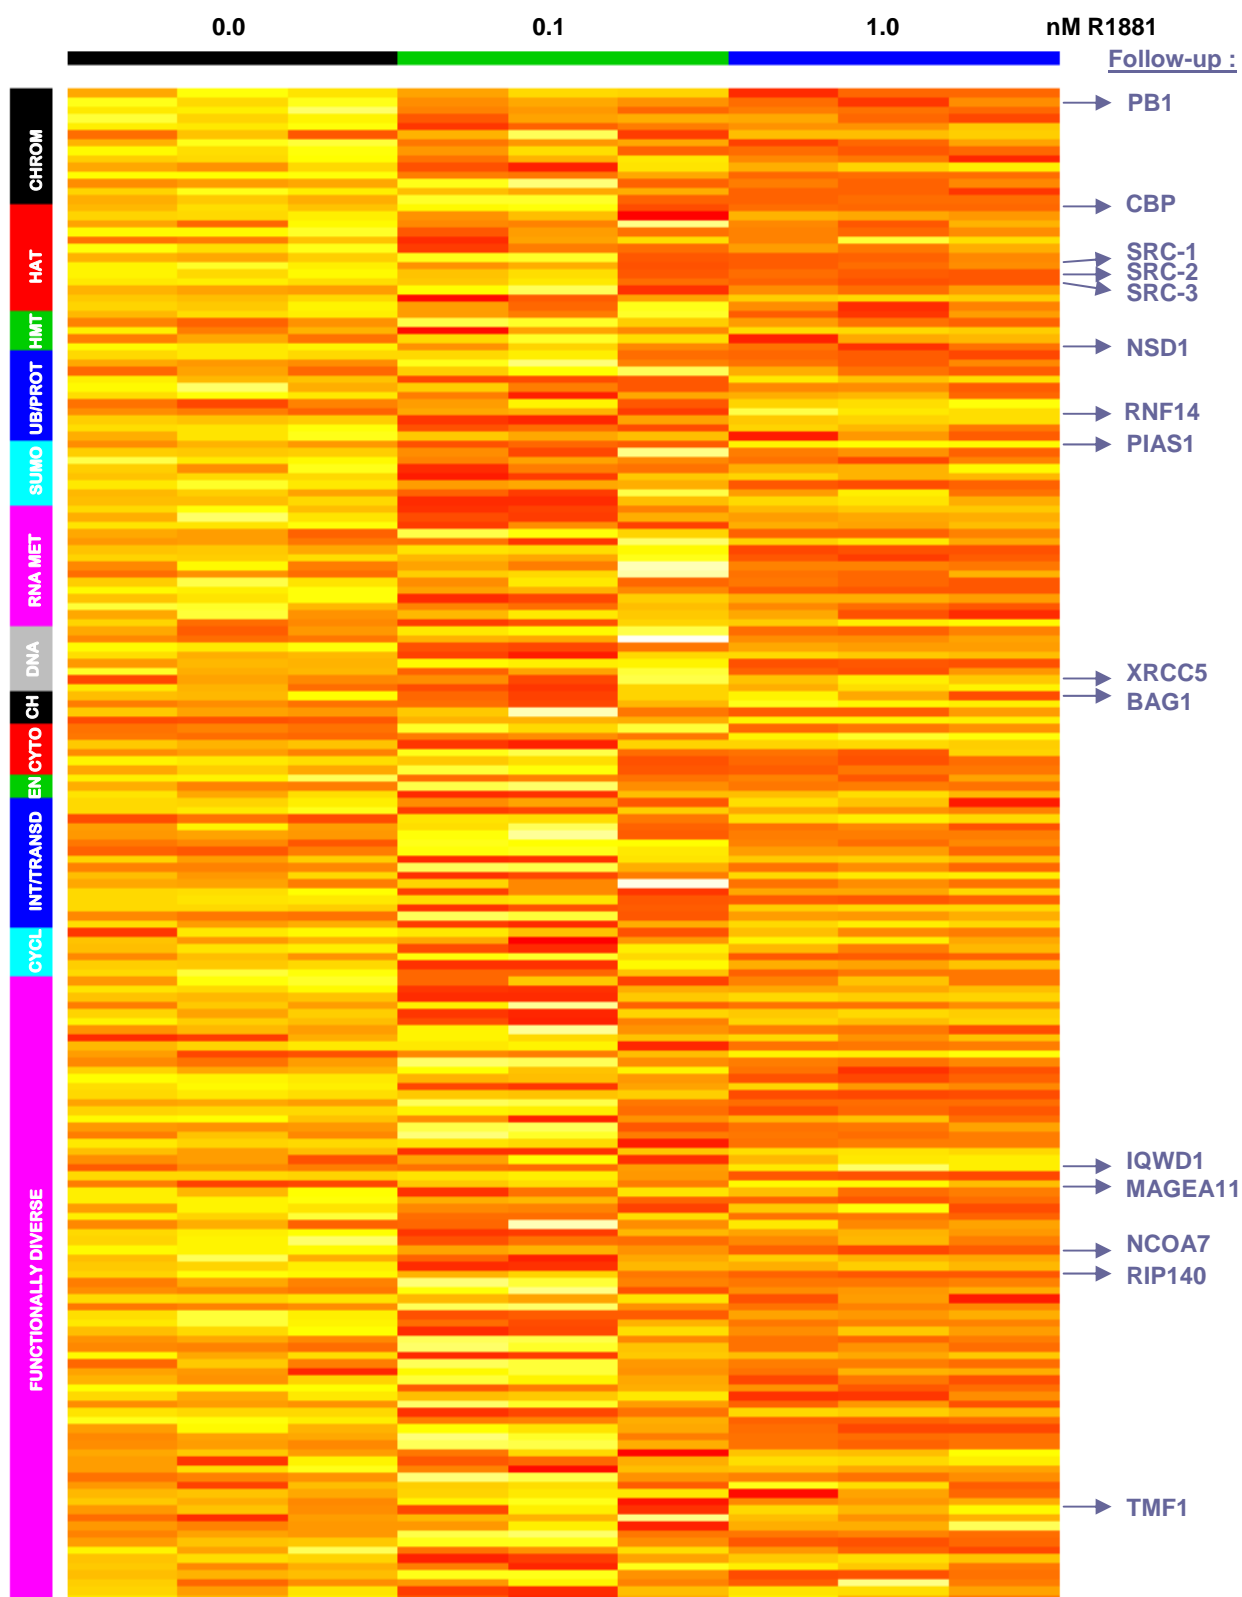

Supplement: me.2008-0363_2.pdf [file me.2008-0363_2.pdf]

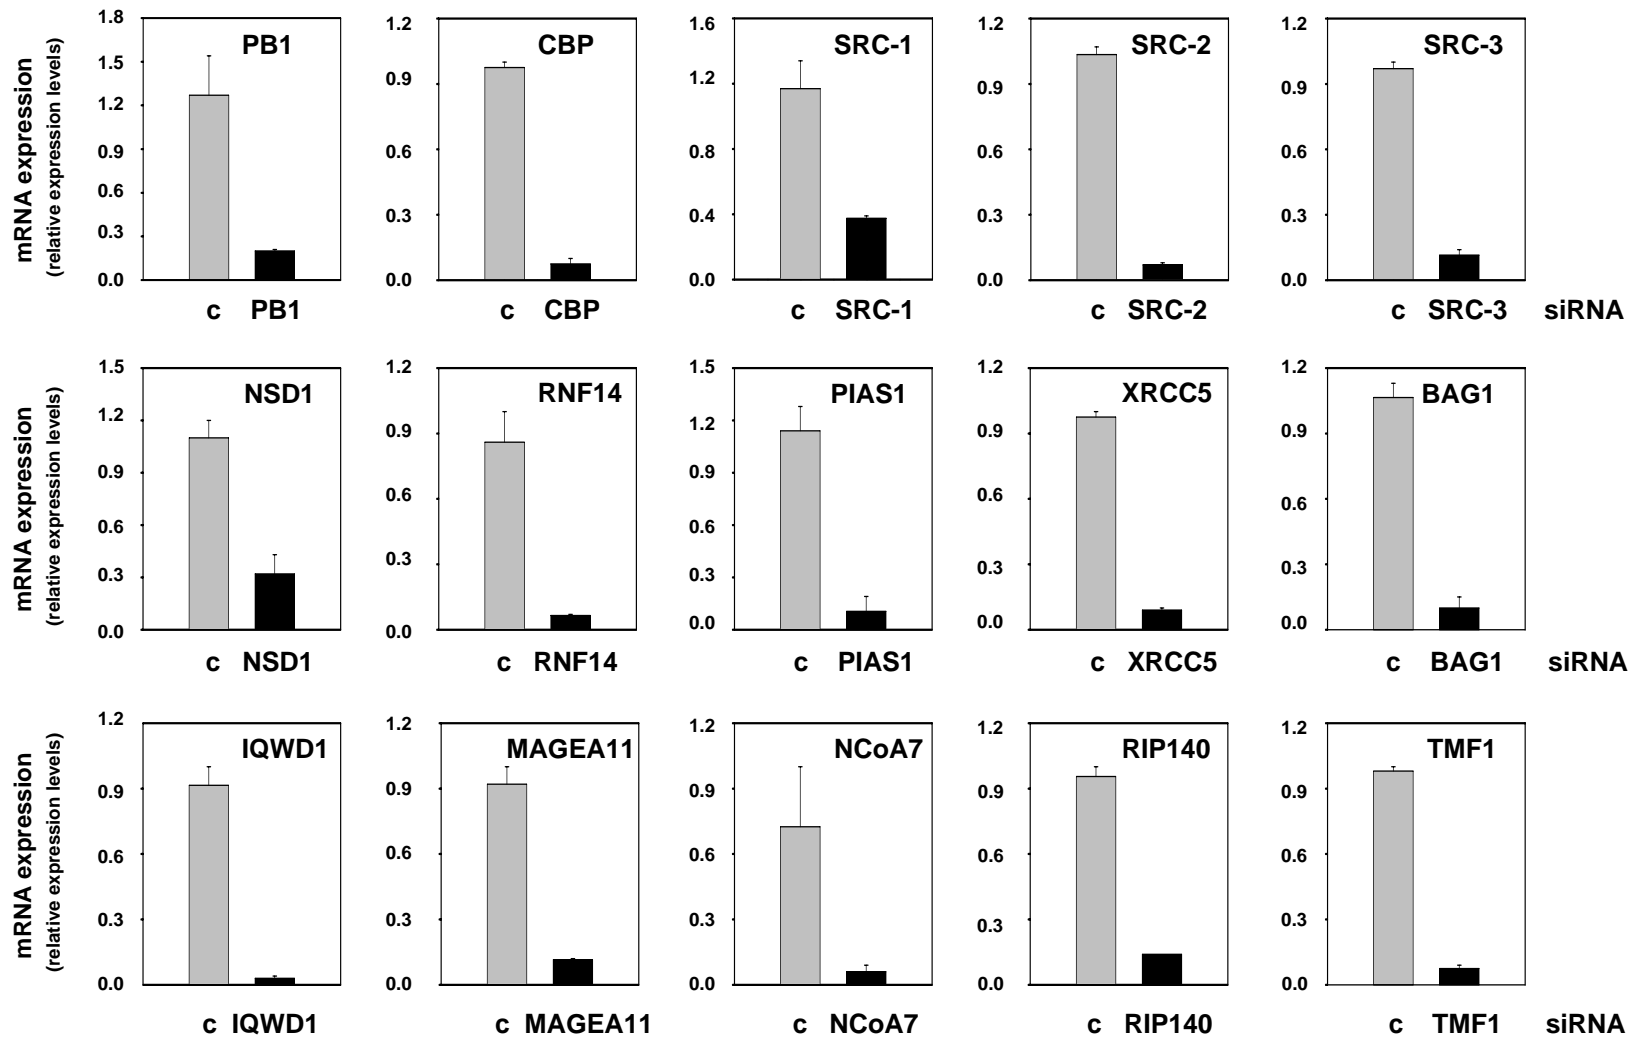

Supplement: me.2008-0363_3.pdf [file me.2008-0363_3.pdf]

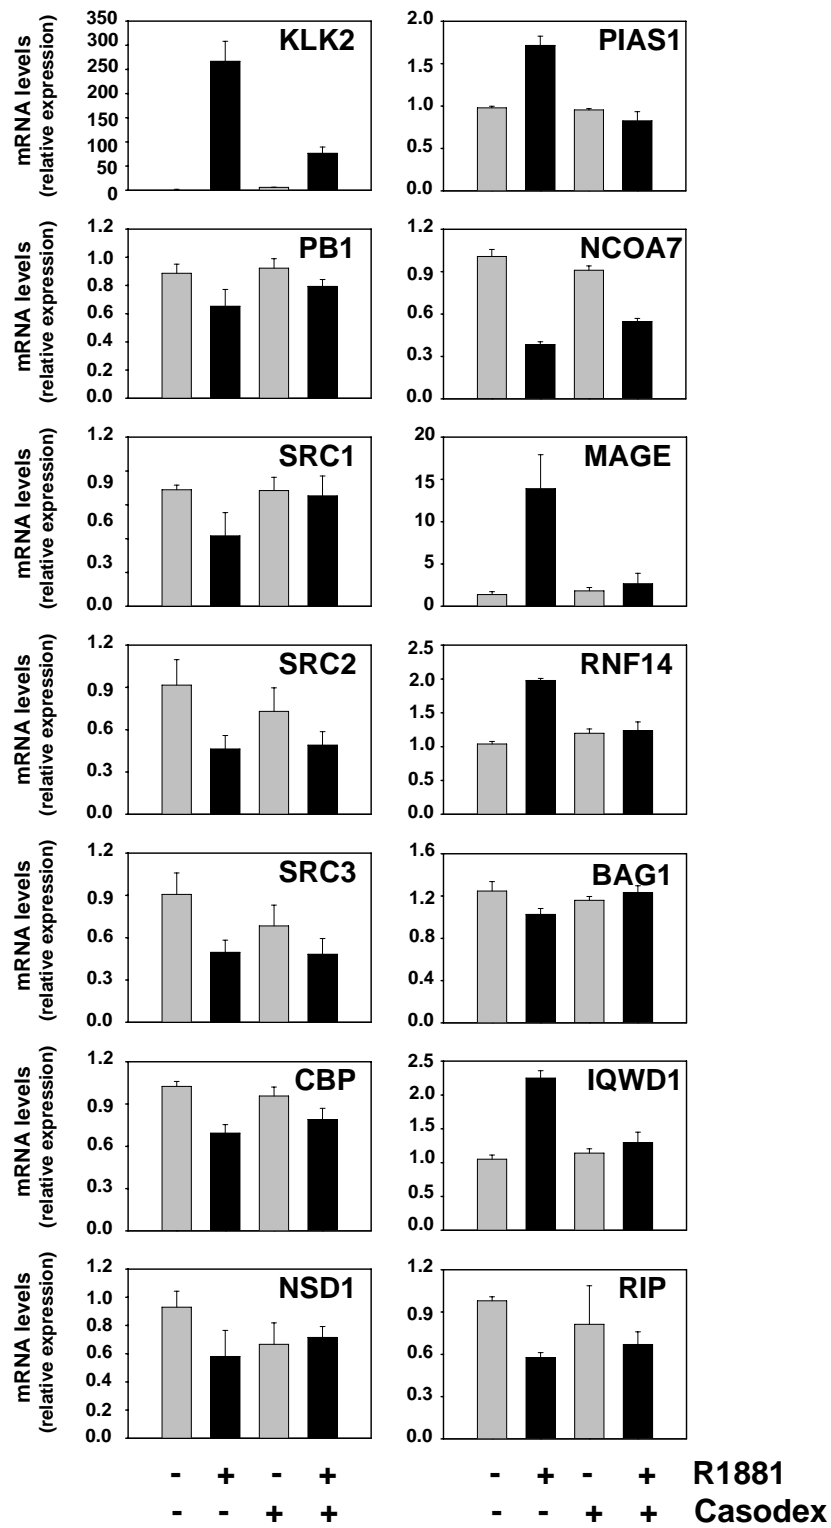

Supplement: me.2008-0363_4.pdf [file me.2008-0363_4.pdf]

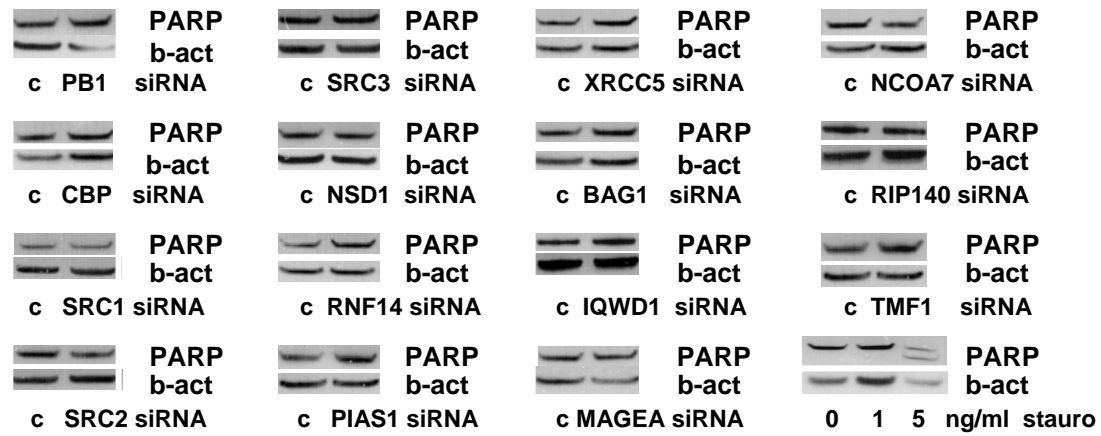

Supplement: me.2008-0363_6.pdf [file me.2008-0363_6.pdf]
